# Supplementary material for: Seasonal Variations in the Metabolome and Bioactivity Profile of Fucus vesiculosus Extracted by an Optimised, Pressurised Liquid Extraction Protocol
Source: PubMed Central journal article supplement (PMC6315544; doi:10.3390/md16120503), 2018-12-13
Supplement: marinedrugs-16-00503-s001.pdf [file marinedrugs-16-00503-s001.pdf]

Supplementary materials

# Seasonal Variations in the Metabolome and Bioactivity Profile of *Fucus vesiculosus* Extracted by an Optimised, Pressurised Liquid Extraction Protocol

Edwin Heavisides <sup>1</sup>, Caroline Rouger <sup>1,†</sup>, Anna F. Reichel <sup>1</sup>, Cornelia Ulrich <sup>1</sup>, Arlette Wenzel-Storjohann <sup>1</sup>, Susanne Sebens <sup>2</sup> and Deniz Tasdemir <sup>1,3,\*</sup>

<sup>1</sup> GEOMAR Centre for Marine Biotechnology (GEOMAR-Biotech), Research Unit Marine Natural Products Chemistry, GEOMAR Helmholtz Centre for Ocean Research Kiel, Am Kiel-Kanal 44, 24106 Kiel, Germany; edheavisides@outlook.com (E.H.); caroline.rouger@u-bordeaux.fr (C.R.), reichel-anna@gmx.de (A.F.R.); cornelia.ulrich@mpimf-heidelberg.mpg.de (C.U.); awenzel-storjohann@geomar.de (A.W.-S.)

<sup>2</sup> Institute for Experimental Cancer Research, Christian-Albrechts-University Kiel (CAU) and University Medical Center Schleswig-Holstein (UKSH) Campus Kiel, Arnold-Heller-Str. 3, Building 17, 24105 Kiel, Germany; susanne.sebens@email.uni-kiel.de

<sup>3</sup> Faculty of Mathematics and Natural Sciences, Christian-Albrechts-University Kiel (CAU), Christian-Albrechts-Platz 4, 24118 Kiel, Germany

\* Correspondence: dtasdemir@geomar.de; Tel.: +49-431-600-4430

† Current address: Univ. de Bordeaux, UFR des Sciences Pharmaceutiques, Unité de recherche Œnologie EA 4577, USC 1366 INRA, ISVV, 210 Chemin de Leysotte, CS 50008, 33882 Villenave d'Ornon, France.

| <b>Table No.</b>                                                                                                                                                                                                                                                                                                                                      | <b>Page No.</b> |
|-------------------------------------------------------------------------------------------------------------------------------------------------------------------------------------------------------------------------------------------------------------------------------------------------------------------------------------------------------|-----------------|
| <b>Table S1.</b> Dereplication of compounds identified in monthly <i>F. vesiculosus</i> organic extracts from Jan. 2017 – Dec. 2017, based on UPLC-PDA-(ESI+)MS <sup>2</sup> data.                                                                                                                                                                    | 3               |
| <b>Table S2.</b> Dereplication table of the 54 compounds significantly varying with collection month.                                                                                                                                                                                                                                                 | 6               |
| <b>Table S3.</b> Pathogen strains and their strain-specific culture conditions.                                                                                                                                                                                                                                                                       | 13              |
| <br>                                                                                                                                                                                                                                                                                                                                                  |                 |
| <b>Figure No.</b>                                                                                                                                                                                                                                                                                                                                     |                 |
| <b>Figure S1.</b> Statistical linear regression analyses of the relationships between the five extraction variables and: (A) number of ELSD signal peaks (1 <sup>st</sup> repeat); (B) average number of UV peaks (2 <sup>nd</sup> repeat); (C) 405 nm UV peak area (2 <sup>nd</sup> repeat); (D) number of 280 nm UV peaks (2 <sup>nd</sup> repeat). | 14              |
| <b>Figure S2.</b> Seasonality box plots depicting monthly median (bold), 1 <sup>st</sup> -3 <sup>rd</sup> quartiles (lower-upper box limits), and minimum and maximum (lower and upper bars) total ion count for compounds I-VIII.                                                                                                                    | 15              |
| <b>Figure S3.</b> Seasonality box plots depicting monthly median (bold), 1 <sup>st</sup> -3 <sup>rd</sup> quartiles (lower-upper box limits), and minimum and maximum (lower and upper bars) total ion count for compounds IX-XVI.                                                                                                                    | 16              |
| <b>Figure S4.</b> Seasonality box plots depicting monthly median (bold), 1 <sup>st</sup> -3 <sup>rd</sup> quartiles (lower-upper box limits), and minimum and maximum (lower and upper bars) total ion count for compounds XVII-XXIV.                                                                                                                 | 17              |
| <b>Figure S5.</b> Seasonality box plots depicting monthly median (bold), 1 <sup>st</sup> -3 <sup>rd</sup> quartiles (lower-upper box limits), and minimum and maximum (lower and upper bars) total ion count for compounds XXV-XXXII.                                                                                                                 | 18              |
| <b>Figure S6.</b> Seasonality box plots depicting monthly median (bold), 1 <sup>st</sup> -3 <sup>rd</sup> quartiles (lower-upper box limits), and minimum and maximum (lower and upper bars) total ion count for compounds XXXIII-XL.                                                                                                                 | 19              |
| <b>Figure S7.</b> Seasonality box plots depicting monthly median (bold), 1 <sup>st</sup> -3 <sup>rd</sup> quartiles (lower-upper box limits), and minimum and maximum (lower and upper bars) total ion count for compounds XLI-XLVIII.                                                                                                                | 20              |
| <b>Figure S8.</b> Seasonality box plots depicting monthly median (bold), 1 <sup>st</sup> -3 <sup>rd</sup> quartiles (lower-upper box limits), and minimum and maximum (lower and upper bars) total ion count for compounds XLIX-LIV.                                                                                                                  | 21              |

**Table S1.** Dereplication of compounds identified in monthly *F. vesiculosus* organic extracts from Jan. 2017 – Dec. 2017, based on UPLC-PDA-(ESI+)MS<sup>2</sup> data.

| Comp. ID | t <sub>R</sub> (min) | Chemical class           | Putative identification                                                                                | Mol. Formula (M)                                                | MS <sup>1</sup> (m/z)                           | Error (Δppm)      | Confidence level <sup>a</sup> | MS <sup>2</sup> (m/z)                                                                                  | UV λ <sub>max</sub> (nm) <sup>b</sup> |
|----------|----------------------|--------------------------|--------------------------------------------------------------------------------------------------------|-----------------------------------------------------------------|-------------------------------------------------|-------------------|-------------------------------|--------------------------------------------------------------------------------------------------------|---------------------------------------|
| 1        | 0.98                 | Phlorotannin             | Fucodiphlorethol A, B, C, D, E, G or Difucophlorethol A or Tetrafulcol A, B or Tetraphlorethol A, C, E | C <sub>24</sub> H <sub>18</sub> O <sub>12</sub>                 | 499.084 [M+H] <sup>+</sup>                      | 7.3               | 2                             | 481.09, 463.08, 411.08, 395.09, 393.07, 355.06, 337.05, 327.06, 287.07, 285.05, 271.04, 269.05, 139.04 |                                       |
| 2        | 6.12                 | Phosphatidylcholine      | LysoPC <sup>c</sup> 20:5                                                                               | C <sub>28</sub> H <sub>48</sub> NO <sub>7</sub> P               | 542.321 [M+H] <sup>+</sup>                      | 6.8               | 2                             | 524.33, 184.08, 104.11                                                                                 |                                       |
| 3        | 6.27                 | Betaine lipid            | LysoDGTSA <sup>d</sup> 14:0                                                                            | C <sub>24</sub> H <sub>47</sub> NO <sub>6</sub>                 | 446.339 [M+H] <sup>+</sup>                      | 20.5 <sup>f</sup> | 2                             | 428.35, 285.25, 236.16, 144.11                                                                         |                                       |
| 4        | 6.29                 | Betaine lipid            | LysoDGTSA 18:3                                                                                         | C <sub>28</sub> H <sub>49</sub> NO <sub>6</sub>                 | 496.350 [M+H] <sup>+</sup>                      | 27.8 <sup>f</sup> | 2                             | 478.37, 236.15, 144.11                                                                                 |                                       |
| 5        | 6.31                 | Betaine lipid            | LysoDGTSA 20:5                                                                                         | C <sub>30</sub> H <sub>49</sub> NO <sub>6</sub>                 | 520.354 [M+H] <sup>+</sup>                      | 18.9 <sup>f</sup> | 2                             | 502.37, 236.15                                                                                         |                                       |
| 6        | 6.68                 | Phosphatidylethanolamine | LysoPE <sup>e</sup> 20:4                                                                               | C <sub>25</sub> H <sub>43</sub> NO <sub>7</sub> P               | 502.283 [M+H] <sup>+</sup>                      | 20.6 <sup>f</sup> | 2                             | 422.16, 379.17, 361.28                                                                                 |                                       |
| 7        | 6.81                 | Betaine lipid            | LysoDGTSA 18:2                                                                                         | C <sub>28</sub> H <sub>51</sub> NO <sub>6</sub>                 | 498.376 [M+H] <sup>+</sup>                      | 6.9               | 2                             | 480.37, 361.29, 236.16, 144.11                                                                         |                                       |
| 8        | 6.88                 | Betaine lipid            | LysoDGTSA 20:4                                                                                         | C <sub>30</sub> H <sub>51</sub> NO <sub>6</sub>                 | 522.377 [M+H] <sup>+</sup>                      | 4.7               | 2                             | 504.38, 236.16, 173.03                                                                                 |                                       |
| 9        | 7.27                 | Betaine lipid            | LysoDGTSA 20:3                                                                                         | C <sub>30</sub> H <sub>53</sub> NO <sub>6</sub>                 | 546.369 [M+Na] <sup>+</sup>                     | 14.7 <sup>f</sup> | 2                             | 528.39, 236.16                                                                                         |                                       |
| 10       | 7.45                 | Betaine lipid            | LysoDGTSA 16:0                                                                                         | C <sub>26</sub> H <sub>51</sub> NO <sub>6</sub>                 | 474.373 [M+H] <sup>+</sup>                      | 13.6 <sup>f</sup> | 2                             | 456.40, 351.14, 313.29, 236.16, 144.11                                                                 |                                       |
| 11       | 7.52                 | Betaine lipid            | LysoDGTSA 18:1                                                                                         | C <sub>28</sub> H <sub>53</sub> NO <sub>6</sub>                 | 500.392 [M+H] <sup>+</sup>                      | 6.2               | 2                             | 482.39, 422.15, 236.16                                                                                 |                                       |
| 12       | 7.76                 | Carotenoid               | Fucoxanthin dehydrated                                                                                 | C <sub>42</sub> H <sub>58</sub> O <sub>6</sub>                  | 641.427 [M+H-<br>H <sub>2</sub> O] <sup>+</sup> | 10.0 <sup>f</sup> | 2                             | 549.37, 221.16, 203.15                                                                                 |                                       |
| 13       | 8.40                 | Carotenoid               | Violaxanthin or Neoxanthin                                                                             | C <sub>40</sub> H <sub>56</sub> O <sub>4</sub>                  | 583.420 [M+H-<br>H <sub>2</sub> O] <sup>+</sup> | 8.4               | 2                             | 491.37, 283.22, 221.16, 165.10                                                                         |                                       |
| 14       | 9.30                 | Chlorophyll              | Chlorophyll <i>c</i> 2                                                                                 | C <sub>35</sub> H <sub>28</sub> MgN <sub>4</sub> O <sub>5</sub> | 609.204 [M+H] <sup>+</sup>                      | 8.5               | 2                             | 591.23, 549.21, 534.23, 532.19                                                                         |                                       |
| 15       | 9.61                 | Chlorophyll              |                                                                                                        |                                                                 | 623.413 [M+H] <sup>+</sup>                      |                   | 3                             | 605.42, 587.42, 549.34, 531.34, 295.17, 259.13                                                         | 224, 450                              |
| 16       | 10.71                | Phosphatidylcholine      |                                                                                                        |                                                                 | 782.590 [M+H] <sup>+</sup>                      |                   | 3                             | 750.57, 572.39, 554.39, 446.37, 428.35, 184.08                                                         |                                       |
| 17       | 10.71                | Chlorophyll              | Pheophytin <i>b</i>                                                                                    | C <sub>55</sub> H <sub>72</sub> N <sub>4</sub> O <sub>6</sub>   | 885.602 [M+H] <sup>+</sup>                      | 55.3 <sup>f</sup> | 2                             | 607.30, 547.28                                                                                         |                                       |
| 18       | 10.93                | Carotenoid               | Fucoxanthinol                                                                                          | C <sub>40</sub> H <sub>56</sub> O <sub>5</sub>                  | 599.408 [M+H-<br>H <sub>2</sub> O] <sup>+</sup> | 3.4               | 2                             | 581.42, 411.28, 355.25, 277.21, 263.19, 213.13, 199.15, 185.14, 173.14, 127.11, 109.10                 | 224, 265, 330, 447, 470               |
| 19       | 10.94                | Carotenoid               | Fucoxanthin                                                                                            | C <sub>42</sub> H <sub>58</sub> O <sub>6</sub>                  | 681.421 [M+Na] <sup>+</sup>                     | 11.6 <sup>f</sup> | 1 <sup>g</sup>                | 663.42, 621.41, 603.40, 527.33                                                                         | 224, 265, 330, 447, 470               |
|          |                      |                          |                                                                                                        |                                                                 | 659.435 [M+H] <sup>+</sup>                      | 6.4               | 1                             | 641.46, 581.43, 109.11                                                                                 |                                       |
| 20       | 11.20                | Chlorophyll              | Pheophorbide <i>a</i>                                                                                  | C <sub>35</sub> H <sub>36</sub> N <sub>4</sub> O <sub>5</sub>   | 593.279 [M+H] <sup>+</sup>                      | 4.4               | 2                             | 533.27                                                                                                 | 224, 265, 330, 409, 505, 535          |
| 21       | 11.35                | Phosphatidylcholine      |                                                                                                        |                                                                 | 810.625 [M+H] <sup>+</sup>                      |                   | 3                             | 778.60, 313.28, 184.08                                                                                 |                                       |
| 22       | 11.40                | Betaine lipid            | DGTSA 32:4                                                                                             | C <sub>42</sub> H <sub>73</sub> NO <sub>7</sub>                 | 704.553 [M+H] <sup>+</sup>                      | 9.2               | 2                             | 494.37, 476.35, 446.38, 428.35,                                                                        |                                       |

|    |       |                          |                                     |                                                               |                            |                   |   |                                                                |        |                         |
|----|-------|--------------------------|-------------------------------------|---------------------------------------------------------------|----------------------------|-------------------|---|----------------------------------------------------------------|--------|-------------------------|
|    |       |                          | (18:4/14:0 or 14:0/18:4)            |                                                               |                            |                   |   |                                                                | 144.11 |                         |
| 23 | 11.47 | Chlorophyll              | Pheophytin c2                       | C <sub>35</sub> H <sub>30</sub> N <sub>4</sub> O <sub>5</sub> | 587.231 [M+H] <sup>+</sup> | 2.6               | 2 | 543.25, 527.22, 511.23                                         |        | 224, 450                |
| 24 | 11.47 | Phosphatidylcholine      |                                     | C <sub>45</sub> H <sub>82</sub> NO <sub>7</sub> P             | 780.594 [M+H] <sup>+</sup> | 4.2               | 3 | 520.38, 502.37, 496.38, 478.36, 184.08                         |        |                         |
| 25 | 11.55 | Betaine lipid            | DGTSA 30:2 (16:2/14:0 or 14:0/16:2) | C <sub>40</sub> H <sub>73</sub> NO <sub>7</sub>               | 680.551 [M+H] <sup>+</sup> | 6.6               | 2 | 470.35, 452.35, 446.36, 428.36, 144.10                         |        |                         |
| 26 | 11.60 | Betaine lipid            | DGTSA 34:5 (20:5/14:0 or 14:0/20:5) | C <sub>44</sub> H <sub>75</sub> NO <sub>7</sub>               | 730.575 [M+H] <sup>+</sup> | 17.6 <sup>f</sup> | 2 | 520.38, 502.36, 446.36, 428.35, 144.10                         |        |                         |
| 27 | 11.68 | Phosphatidylcholine      |                                     |                                                               | 806.611 [M+H] <sup>+</sup> |                   | 3 | 702.53, 522.39, 520.39, 504.38, 502.37, 184.08                 |        |                         |
| 28 | 11.72 | Betaine lipid            | DGTSA 32:3 (18:3/14:0 or 14:0/18:3) | C <sub>42</sub> H <sub>75</sub> NO <sub>7</sub>               | 706.569 [M+H] <sup>+</sup> | 9.7               | 2 | 496.37, 478.36, 446.36, 428.35, 144.10                         |        |                         |
| 29 | 11.80 | Phosphatidylcholine      |                                     | C <sub>45</sub> H <sub>84</sub> NO <sub>7</sub> P             | 782.607 [M+H] <sup>+</sup> | 0.8               | 3 | 678.53, 184.08                                                 |        |                         |
| 30 | 11.84 | Carotenoid               |                                     | C <sub>40</sub> H <sub>52</sub> O <sub>3</sub>                | 581.401 [M+H] <sup>+</sup> | 2.6               | 3 | 563.42, 411.29, 355.26, 277.21, 251.20, 185.14, 127.12, 109.11 |        | 225, 265, 330, 442, 470 |
| 31 | 11.86 | Betaine lipid            | DGTSA 28:0 (14:0/14:0)              | C <sub>38</sub> H <sub>73</sub> NO <sub>7</sub>               | 656.550 [M+H] <sup>+</sup> | 5.3               | 2 | 446.38, 428.37, 109.11                                         |        |                         |
| 32 | 11.91 | Betaine lipid            | DGTSA 34:4 (20:4/14:0 or 14:0/20:4) | C <sub>44</sub> H <sub>77</sub> NO <sub>7</sub>               | 732.589 [M+H] <sup>+</sup> | 15.2 <sup>f</sup> | 2 | 522.41, 504.40, 446.37, 428.37, 144.11                         |        |                         |
| 33 | 12.08 | Betaine lipid            | DGTSA 32:2 (18:2/14:0 or 14:0/18:2) | C <sub>42</sub> H <sub>77</sub> NO <sub>7</sub>               | 708.593 [M+H] <sup>+</sup> | 21.4 <sup>f</sup> | 2 | 498.41, 480.40, 446.38, 428.37, 144.11                         |        |                         |
| 34 | 12.09 | Phospholipid             |                                     | C <sub>43</sub> H <sub>84</sub> NO <sub>7</sub> P             | 758.605 [M+H] <sup>+</sup> | 1.8               | 3 | 654.53, 520.37, 502.36, 474.40, 456.39, 184.08                 |        |                         |
| 35 | 12.13 | Phospholipid             |                                     | C <sub>45</sub> H <sub>86</sub> NO <sub>7</sub> P             | 784.623 [M+H] <sup>+</sup> | 1.3               | 3 | 647.54, 522.41, 504.39, 498.42, 480.40, 184.09, 144.11         |        |                         |
| 36 | 12.26 | Betaine lipid            |                                     | C <sub>44</sub> H <sub>79</sub> NO <sub>7</sub>               | 734.605 [M+H] <sup>+</sup> | 15.7              | 3 | 524.43, 506.42, 496.40, 474.41, 456.40, 446.38, 428.36, 144.11 |        |                         |
| 37 | 12.30 | Phosphatidylethanolamine |                                     | C <sub>47</sub> H <sub>88</sub> NO <sub>7</sub> P             | 810.637 [M+H] <sup>+</sup> | 0.8               | 3 | 669.51, 522.41, 504.39, 164.02                                 |        |                         |
| 38 | 12.50 | Betaine lipid            | DGTSA 30:0 (16:0/14:0 or 14:0/16:0) | C <sub>40</sub> H <sub>77</sub> NO <sub>7</sub>               | 684.585 [M+H] <sup>+</sup> | 10.5 <sup>f</sup> | 2 | 474.40, 456.39, 446.37, 428.35                                 |        |                         |
| 39 | 12.56 | Betaine lipid            | DGTSA 32:1 (18:1/14:0 or 14:0/18:1) | C <sub>42</sub> H <sub>79</sub> NO <sub>7</sub>               | 710.599 [M+H] <sup>+</sup> | 7.8               | 2 | 500.42, 482.40, 446.36, 428.36, 144.11                         |        |                         |
| 40 | 12.59 | Chlorophyll              | Methylpheophorbide                  | C <sub>36</sub> H <sub>38</sub> N <sub>4</sub> O <sub>5</sub> | 607.292 [M+H] <sup>+</sup> | 0.1               | 2 | 547.29                                                         |        |                         |

| <i>a</i> |       |               |                      |                                                               |                                               |                   |   |                                           |
|----------|-------|---------------|----------------------|---------------------------------------------------------------|-----------------------------------------------|-------------------|---|-------------------------------------------|
| 41       | 12.73 | Betaine lipid |                      | C <sub>44</sub> H <sub>81</sub> NO <sub>7</sub>               | 736.619 [M+H] <sup>+</sup>                    | 13.4 <sup>f</sup> | 3 | 498.40, 480.38, 474.39, 456.38            |
| 42       | 13.26 | Tocopherol    | $\alpha$ -Tocopherol | C <sub>29</sub> H <sub>50</sub> O <sub>2</sub>                | 429.364<br>[M+H-H <sub>2</sub> ] <sup>+</sup> | 21.6 <sup>f</sup> | 2 | 311.30, 205.12, 191.11, 165.09,<br>163.11 |
| 43       | 13.37 | Chlorophyll   | Pheophytin <i>a</i>  | C <sub>55</sub> H <sub>74</sub> N <sub>4</sub> O <sub>5</sub> | 871.582 [M+H] <sup>+</sup>                    | 9.5               | 2 | 593.32, 533.29                            |
| 44       | 13.59 | Carotenoid    | Zeaxanthin           | C <sub>40</sub> H <sub>56</sub> O <sub>2</sub>                | 569.433 [M+H] <sup>+</sup>                    | 5.0               | 2 | 477.42                                    |

<sup>a</sup> Confidence level of the metabolite identification based on Sumner *et al.* 2007 and Blaženovic *et al.* 2018.

<sup>b</sup> When no  $\lambda_{\max}$  indicated, either no absorbance, or compound in too low amount to be detected

<sup>c</sup> LysoPC: lysophosphatidylcholine

<sup>d</sup> DGTSA: either DGTS [1,2-diacylglycerol-*O*-2'-(hydroxymethyl)-(N,N,N-trimethyl)homoserine] or DGTA [1,2-diacylglycerol-*O*-2'-(hydroxymethyl)-(N,N,N-trimethyl)- $\beta$ -alanine]

<sup>e</sup> LysoPE: lysophosphatidylethanolamine

<sup>f</sup> High  $\Delta$  ppm ( $\geq 10$  ppm) due to a detection saturation or to a very low intensity of the ion in the UPLC-MS chromatogram

<sup>g</sup> Identification confirmed by comparison with a purchased commercial standard

**Table S2.** Dereplication table of the 54 compounds significantly varying with collection month.

| Box plot ID | Compound ID | RT (min) | Chemical class | Tentative identification                                                                                        | Formula (M)                                                     | MS <sup>1</sup> ( <i>m/z</i> )                     | Error ( $\Delta$ ppm) | Confidence level <sup>a</sup> | MS <sup>2</sup> ( <i>m/z</i> )                                                                                                            | UV $\lambda_{\max}$ (nm) <sup>b</sup> |
|-------------|-------------|----------|----------------|-----------------------------------------------------------------------------------------------------------------|-----------------------------------------------------------------|----------------------------------------------------|-----------------------|-------------------------------|-------------------------------------------------------------------------------------------------------------------------------------------|---------------------------------------|
| I           | 1           | 0.98     | Phlorotannins  | Fucodiphlorethol A, B, C, D, E, G or<br>Difucophlorethol A or<br>Tetrafulcol A, B or<br>Tetraphlorethol A, C, E | C <sub>24</sub> H <sub>18</sub> O <sub>12</sub>                 | 499.084<br>[M+H] <sup>+</sup>                      | 7.3                   | 2                             | 481.09,<br>463.08,<br>411.08,<br>395.09,<br>393.07,<br>355.06,<br>337.05,<br>327.06,<br>287.07,<br>285.05,<br>271.04,<br>269.05<br>139.04 |                                       |
| II          |             | 5.23     |                |                                                                                                                 |                                                                 | 507.251                                            |                       |                               |                                                                                                                                           |                                       |
| III         |             | 6.19     |                |                                                                                                                 |                                                                 | 535.285                                            |                       |                               |                                                                                                                                           |                                       |
| IV          | 3           | 6.27     | Betaine lipids | LysoDGTSA <sup>c</sup> 14:0                                                                                     | C <sub>24</sub> H <sub>47</sub> NO <sub>6</sub>                 | 446.339<br>[M+H] <sup>+</sup>                      | 20.5 <sup>d</sup>     | 2                             | 428.35,<br>285.25,<br>236.16,<br>144.11                                                                                                   |                                       |
| V           | 7           | 6.81     | Betaine lipids | LysoDGTSA 18:2                                                                                                  | C <sub>28</sub> H <sub>51</sub> NO <sub>6</sub>                 | 498.376<br>[M+H] <sup>+</sup>                      | 6.9                   | 2                             | 480.37,<br>361.29,<br>236.16,<br>144.11                                                                                                   |                                       |
| VI          | 10          | 7.45     | Betaine lipids | LysoDGTSA 16:0                                                                                                  | C <sub>26</sub> H <sub>51</sub> NO <sub>6</sub>                 | 474.373<br>[M+H] <sup>+</sup>                      | 13.6 <sup>d</sup>     | 2                             | 456.40,<br>351.14,<br>313.29,<br>236.16,<br>144.11                                                                                        |                                       |
| VII         | 12          | 7.76     | Carotenoids    | Fucoxanthin (dehydrated)                                                                                        | C <sub>42</sub> H <sub>58</sub> O <sub>6</sub>                  | 641.427<br>[M+H-<br>H <sub>2</sub> O] <sup>+</sup> | 10.0 <sup>d</sup>     | 2                             | 549.37,<br>221.16,<br>203.15                                                                                                              |                                       |
| VIII        | 14          | 9.30     | Chlorophylls   | Chlorophyll <i>c</i> 2                                                                                          | C <sub>35</sub> H <sub>28</sub> MgN <sub>4</sub> O <sub>5</sub> | 609.204<br>[M+H] <sup>+</sup>                      | 8.5                   | 2                             | 591.23,<br>549.21,<br>534.23,<br>532.19                                                                                                   |                                       |

|      |    |       |                      |               |                                                |                                                    |     |   |                                                                                                                      |                                     |
|------|----|-------|----------------------|---------------|------------------------------------------------|----------------------------------------------------|-----|---|----------------------------------------------------------------------------------------------------------------------|-------------------------------------|
| IX   |    | 9.37  |                      |               |                                                | 658.532                                            |     |   | 448.34,<br>446.36,<br>430.34,<br>428.35                                                                              | 224,<br>450                         |
| X    |    | 9.61  |                      |               |                                                | 600.420                                            |     |   | 291.19,<br>263.20,<br>145.11,<br>121.11                                                                              | 224,<br>450                         |
| XI   | 15 | 9.61  | Chlorophylls         |               |                                                | 623.413<br>[M+H] <sup>+</sup>                      | 3   |   | 605.42,<br>587.42,<br>549.34,<br>531.34,<br>295.17,<br>259.13<br>750.57                                              | 224,<br>450                         |
| XII  |    | 9.87  |                      |               |                                                | 768.576                                            |     |   |                                                                                                                      |                                     |
| XIII |    | 10.25 |                      |               |                                                | 686.562                                            |     |   |                                                                                                                      |                                     |
| XIV  | 16 | 10.71 | Phosphatidylcholines |               |                                                | 782.590<br>[M+H] <sup>+</sup>                      | 3   |   | 750.57,<br>572.39,<br>554.39,<br>446.37,<br>428.35,<br>184.08                                                        |                                     |
| XV   | 18 | 10.93 | Carotenoids          | Fucoxanthinol | C <sub>40</sub> H <sub>56</sub> O <sub>5</sub> | 599.408<br>[M+H-<br>H <sub>2</sub> O] <sup>+</sup> | 3.4 | 2 | 581.42,<br>411.28,<br>355.25,<br>277.21,<br>263.19,<br>213.13,<br>199.15,<br>185.14,<br>173.14,<br>127.11,<br>109.10 | 224,<br>265,<br>330,<br>447,<br>470 |

|       |    |       |                      |                                      |                                                               |                                |                   |                |                                                                          |                                             |
|-------|----|-------|----------------------|--------------------------------------|---------------------------------------------------------------|--------------------------------|-------------------|----------------|--------------------------------------------------------------------------|---------------------------------------------|
| XVI   | 19 | 10.94 | Carotenoids          | Fucoxanthin                          | C <sub>42</sub> H <sub>58</sub> O <sub>6</sub>                | 681.421<br>[M+Na] <sup>+</sup> | 11.6 <sup>d</sup> | 1 <sup>g</sup> | 663.42,<br>621.41,<br>603.40,<br>527.33,<br>641.46,<br>581.43,<br>109.11 | 224,<br>265,<br>330,<br>447,<br>470         |
| XVII  | 20 | 11.20 | Chlorophylls         | Pheophorbide <i>a</i>                | C <sub>35</sub> H <sub>36</sub> N <sub>4</sub> O <sub>5</sub> | 593.279<br>[M+H] <sup>+</sup>  | 4.4               | 2              | 533.27                                                                   | 224,<br>265,<br>330,<br>409,<br>505,<br>535 |
| XVIII | 21 | 11.35 | Phosphatidylcholines |                                      |                                                               | 810.625<br>[M+H] <sup>+</sup>  |                   | 3              | 778.60,<br>313.28,<br>184.08                                             |                                             |
| XIX   | 22 | 11.40 | Betaine lipids       | DG TSA 32:4 (18:4/14:0 or 14:0/18:4) | C <sub>42</sub> H <sub>73</sub> NO <sub>7</sub>               | 704.553<br>[M+H] <sup>+</sup>  | 9.2               | 2              | 494.37,<br>476.35,<br>446.38,<br>428.35,<br>144.11                       |                                             |
| XX    | 23 | 11.47 | Chlorophylls         | Pheophytin <i>c</i> 2                | C <sub>35</sub> H <sub>30</sub> N <sub>4</sub> O <sub>5</sub> | 587.231<br>[M+H] <sup>+</sup>  | 2.6               | 2              | 543.25,<br>527.22,<br>511.23                                             | 224,<br>450                                 |
| XXI   | 24 | 11.47 | Phosphatidylcholines |                                      |                                                               | 780.594<br>[M+H] <sup>+</sup>  | 4.2               | 3              | 520.38,<br>502.37,<br>496.38,<br>478.36,<br>184.08                       |                                             |
| XXII  | 25 | 11.55 | Betaine lipids       | DG TSA 30:2 (16:2/14:0 or 14:0/16:2) | C <sub>40</sub> H <sub>73</sub> NO <sub>7</sub>               | 680.551<br>[M+H] <sup>+</sup>  | 6.6               | 2              | 470.35,<br>452.35,<br>446.36,<br>428.36,<br>144.10                       |                                             |
| XXIII | 26 | 11.60 | Betaine lipids       | DG TSA 34:5 (20:5/14:0 or 14:0/20:5) | C <sub>44</sub> H <sub>75</sub> NO <sub>7</sub>               | 730.575<br>[M+H] <sup>+</sup>  | 17.6 <sup>d</sup> | 2              | 520.38,<br>502.36,<br>446.36,<br>428.35,<br>144.10                       |                                             |
| XXIV  | 27 | 11.68 | Phosphatidylcholines |                                      |                                                               | 806.611                        |                   | 3              | 702.53,                                                                  |                                             |



|        |    |       |                      |                                        |                                                   |                               |                   |   |  |                    |                                                                                     |                                     |
|--------|----|-------|----------------------|----------------------------------------|---------------------------------------------------|-------------------------------|-------------------|---|--|--------------------|-------------------------------------------------------------------------------------|-------------------------------------|
|        |    |       |                      |                                        |                                                   |                               |                   |   |  | [M+H] <sup>+</sup> | 522.39,<br>520.39,<br>504.38,<br>502.37,<br>184.08                                  |                                     |
| XXV    | 28 | 11.72 | Betaine lipids       | DGTSA 32:3 (18:3/14:0<br>or 14:0/18:3) | C <sub>42</sub> H <sub>75</sub> NO <sub>7</sub>   | 706.569<br>[M+H] <sup>+</sup> | 9.7               | 2 |  |                    | 496.37,<br>478.36,<br>446.36,<br>428.35,<br>144.10                                  |                                     |
| XXVI   | 29 | 11.80 | Phosphatidylcholines |                                        | C <sub>45</sub> H <sub>84</sub> NO <sub>7</sub> P | 782.607<br>[M+H] <sup>+</sup> | 0.8               | 3 |  |                    | 678.53,<br>184.08                                                                   |                                     |
| XXVII  | 30 | 11.84 | Carotenoids          |                                        | C <sub>40</sub> H <sub>52</sub> O <sub>3</sub>    | 581.401<br>[M+H] <sup>+</sup> | 2.6               | 3 |  |                    | 563.42,<br>411.29,<br>355.26,<br>277.21,<br>251.20,<br>185.14,<br>127.12,<br>109.11 | 225,<br>265,<br>330,<br>442,<br>470 |
| XXVIII |    | 11.86 |                      |                                        |                                                   | 641.427                       |                   |   |  |                    | 581.42,<br>411.29,<br>251.20,<br>109.10                                             | 225,<br>330,<br>442                 |
| XXIX   |    | 11.86 |                      |                                        |                                                   | 681.415                       |                   |   |  |                    | 663.42,<br>603.39,<br>527.33                                                        | 225,<br>330,<br>442                 |
| XXX    | 31 | 11.86 | Betaine lipids       | DGTSA 28:0 (14:0/14:0)                 | C <sub>38</sub> H <sub>73</sub> NO <sub>7</sub>   | 656.550<br>[M+H] <sup>+</sup> | 5.3               | 2 |  |                    | 446.38,<br>428.37,<br>109.11                                                        |                                     |
| XXXI   | 32 | 11.91 | Betaine lipids       | DGTSA 34:4 (20:4/14:0 or<br>14:0/20:4) | C <sub>44</sub> H <sub>77</sub> NO <sub>7</sub>   | 732.589<br>[M+H] <sup>+</sup> | 15.2 <sup>d</sup> | 2 |  |                    | 522.41,<br>504.40,<br>446.37,<br>428.37,<br>144.11                                  |                                     |
| XXXII  |    | 11.93 |                      |                                        |                                                   | 682.569                       |                   |   |  |                    | 603.41,<br>527.34                                                                   | 225,<br>265,<br>330,<br>442,<br>470 |

|         |    |       |                |                                         |                     |                               |                   |   |                                                                                                                             |
|---------|----|-------|----------------|-----------------------------------------|---------------------|-------------------------------|-------------------|---|-----------------------------------------------------------------------------------------------------------------------------|
| XXXIII  |    | 11.95 |                |                                         |                     | 808.623                       |                   |   | 704.58,<br>522.40,<br>504.38,<br>377.33                                                                                     |
| XXXIV   |    | 12.01 |                |                                         |                     | 710.593                       |                   |   | 498.40,<br>480.39,<br>446.37,<br>428.35,<br>144.11                                                                          |
| XXXV    |    | 12.05 |                |                                         |                     | 708.793                       |                   |   |                                                                                                                             |
| XXXVI   | 33 | 12.08 | Betaine lipids | DG TSA 32:2 (18:2/14:0 or<br>14:0/18:2) | $C_{42}H_{77}NO_7$  | 708.593<br>[M+H] <sup>+</sup> | 21.4 <sup>d</sup> | 2 | 498.41,<br>480.40,<br>446.38,<br>428.37,<br>144.11                                                                          |
| XXXVII  | 35 | 12.13 | Phospholipids  |                                         | $C_{45}H_{86}NO_7P$ | 784.623<br>[M+H] <sup>+</sup> | 1.3               | 3 | 647.54,<br>522.41,<br>504.39,<br>498.42,<br>480.40,<br>184.09,<br>144.11                                                    |
| XXXVIII |    | 12.15 |                |                                         |                     | 333.223                       |                   |   | 241.21,<br>161.14,<br>145.11,<br>133.11,<br>121.11,<br>119.09,<br>107.09,<br>105.07,<br>95.09,<br>93.07,<br>91.06,<br>81.07 |
| XXXIX   |    | 12.16 |                |                                         |                     | 635.473                       |                   |   | 617.48,<br>543.44,<br>359.27,<br>285.23,<br>267.22,<br>241.20,<br>201.17,<br>161.14,                                        |

|        |    |       |                           |                                         |                                                               |                               |                   |   |                                                                                     |     |
|--------|----|-------|---------------------------|-----------------------------------------|---------------------------------------------------------------|-------------------------------|-------------------|---|-------------------------------------------------------------------------------------|-----|
| XL     |    | 12.17 |                           |                                         |                                                               | 976.626                       |                   |   | 147.12,<br>133.16                                                                   |     |
| XLI    | 36 | 12.26 | Betaine lipids            |                                         | C <sub>44</sub> H <sub>79</sub> NO <sub>7</sub>               | 734.605<br>[M+H] <sup>+</sup> | 15.7              | 3 | 524.43,<br>506.42,<br>496.40,<br>474.41,<br>456.40,<br>446.38,<br>428.36,<br>144.11 | 225 |
| XLII   | 37 | 12.30 | Phosphatidylethanolamines |                                         | C <sub>47</sub> H <sub>88</sub> NO <sub>7</sub> P             | 810.637<br>[M+H] <sup>+</sup> | 0.8               | 3 | 669.51,<br>522.41,<br>504.39,<br>164.02                                             |     |
| XLIII  |    | 12.31 |                           |                                         |                                                               | 957.580                       |                   |   | 795.53,<br>679.36                                                                   |     |
| XLIV   |    | 12.48 |                           |                                         |                                                               | 760.623                       |                   |   | 697.31,<br>656.55,<br>522.4,<br>504.39,<br>474.40,<br>456.38,<br>236.57,<br>144.11  |     |
| XLV    | 38 | 12.50 | Betaine lipids            | DG TSA 30:0 (16:0/14:0 or<br>14:0/16:0) | C <sub>40</sub> H <sub>77</sub> NO <sub>7</sub>               | 684.585<br>[M+H] <sup>+</sup> | 10.5 <sup>d</sup> | 2 | 474.40,<br>456.39,<br>446.37,<br>428.35                                             |     |
| XLVI   | 39 | 12.56 | Betaine lipids            | DG TSA 32:1 (18:1/14:0 or<br>14:0/18:1) | C <sub>42</sub> H <sub>79</sub> NO <sub>7</sub>               | 710.599<br>[M+H] <sup>+</sup> | 7.8               | 2 | 500.42,<br>482.40,<br>446.36,<br>428.36,<br>144.11                                  |     |
| XLVII  | 40 | 12.59 | Chlorophylls              | Methylpheophorbide <i>a</i>             | C <sub>36</sub> H <sub>38</sub> N <sub>4</sub> O <sub>5</sub> | 607.292<br>[M+H] <sup>+</sup> | 0.1               | 2 | 547.29                                                                              |     |
| XLVIII |    | 12.66 |                           |                                         |                                                               | 983.600                       |                   |   | 705.37,<br>681.37                                                                   | 225 |
| XLIX   |    | 12.69 |                           |                                         |                                                               | 767.482                       |                   |   | 519.32,<br>489.27                                                                   |     |
| L      | 41 | 12.73 | Betaine lipids            |                                         | C <sub>44</sub> H <sub>81</sub> NO <sub>7</sub>               | 736.619                       | 13.4 <sup>d</sup> | 3 | 498.40,                                                                             |     |

|      |       |  |                    |                                                               |                             |
|------|-------|--|--------------------|---------------------------------------------------------------|-----------------------------|
|      |       |  | [M+H] <sup>+</sup> | 480.38,<br>474.39,<br>456.38                                  |                             |
| LI   | 12.84 |  | 793.501            | 517.30                                                        |                             |
| LII  | 12.94 |  | 762.639            | 658.56,<br>520.48,<br>506.40,<br>474.41,<br>456.38,<br>144.09 |                             |
| LIII | 13.13 |  | 635.473            |                                                               | 200,<br>225,<br>450,<br>475 |
| LIV  | 13.29 |  | 795.519            | 517.30                                                        |                             |

<sup>a</sup> Confidence level of the metabolite identification based on Sumner *et al.* 2007 and Blaženovic *et al.* 2018.

<sup>b</sup> When no  $\lambda_{\max}$  indicated, either no absorbance, or compound in too low amount to be detected

<sup>c</sup> DGTSA: either DGTS [1,2-diacylglyceryl-*O*-2'-(hydroxymethyl)-(N,N,N-trimethyl)homoserine] or DGTA [1,2-diacylglyceryl-*O*-2'-(hydroxymethyl)-(N,N,N-trimethyl)- $\beta$ -alanine]

<sup>d</sup> High  $\Delta$  ppm ( $\geq 10$  ppm) due to a detection saturation or to a very low intensity of the ion in the UPLC-MS chromatogram

**Table S3.** Pathogen strains and their strain-specific culture conditions.

| Pathogen                                                  | Strain     | Medium             | Positive control | Pre-culture incubation temperature (°C) | Start optical density | Incubation temperature (°C) | Incubation time (h) |
|-----------------------------------------------------------|------------|--------------------|------------------|-----------------------------------------|-----------------------|-----------------------------|---------------------|
| <i>Enterococcus faecium</i>                               | DSM 20478) | M92 <sup>a</sup>   | Ampicillin       | 37                                      | 0.01                  | 37                          | 4                   |
| Methicillin-resistant <i>Staphylococcus aureus</i> (MRSA) | DSM 18827  | TSB12 <sup>b</sup> | Chloramphenicol  | 28                                      | 0.01                  | 37                          | 5                   |
| <i>Klebsiella pneumoniae</i>                              | DSM 30104  | TSB12 <sup>b</sup> | Chloramphenicol  | 28                                      | 0.01                  | 37                          | 5                   |
| <i>Acinetobacter baumannii</i>                            | DSM 30007  | TSB12 <sup>b</sup> | Ampicillin       | 28                                      | 0.01                  | 37                          | 5                   |
| <i>Pseudomonas aeruginosa</i>                             | DSM 1128   | TSB12 <sup>b</sup> | Chloramphenicol  | 37                                      | 0.01                  | 37                          | 5                   |
| <i>Escherichia coli</i>                                   | DSM 1576   | TSB12 <sup>b</sup> | Chloramphenicol  | 28                                      | 0.01                  | 37                          | 5                   |
| <i>Candida albicans</i>                                   | DSM 1386   | M186 <sup>c</sup>  | Nystatin         | 28                                      | 0.03                  | 37                          | 5                   |
| <i>Cryptococcus neoformans</i>                            | DSM 6973   | M186 <sup>c</sup>  | Amphotericin B   | 28                                      | 0.03                  | 28                          | 6-7                 |
| <i>Vibrio anguillarum</i>                                 | DSM 21597  | TM <sup>d</sup>    | Chloramphenicol  | 28                                      | 0.01                  | 28                          | 5                   |
| <i>Pseudoalteromonas bacteriolytica</i>                   | CIP 105725 | TM <sup>d</sup>    | Chloramphenicol  | 28                                      | 0.03                  | 28                          | 6-7                 |
| <i>Pseudoalteromonas elyakovii</i>                        | CIP 105338 | TM <sup>d</sup>    | Chloramphenicol  | 28                                      | 0.03                  | 28                          | 6-7                 |

<sup>a</sup> 30 g tryptic soy broth, 3 g yeast extract, 1000 mL H<sub>2</sub>O, pH 7.0-7.2

<sup>b</sup> 12 g tryptic soy broth, 5 g NaCl, 1000 mL H<sub>2</sub>O

<sup>c</sup> 10 g glucose, 5 g peptone from soybeans, 3 g yeast extract, 3 g malt extract, 1000 mL H<sub>2</sub>O

<sup>d</sup> 5 g peptone from soybeans, 1 g yeast extract, 30 g Tropic Marin artificial sea salt, 1000 mL H<sub>2</sub>O

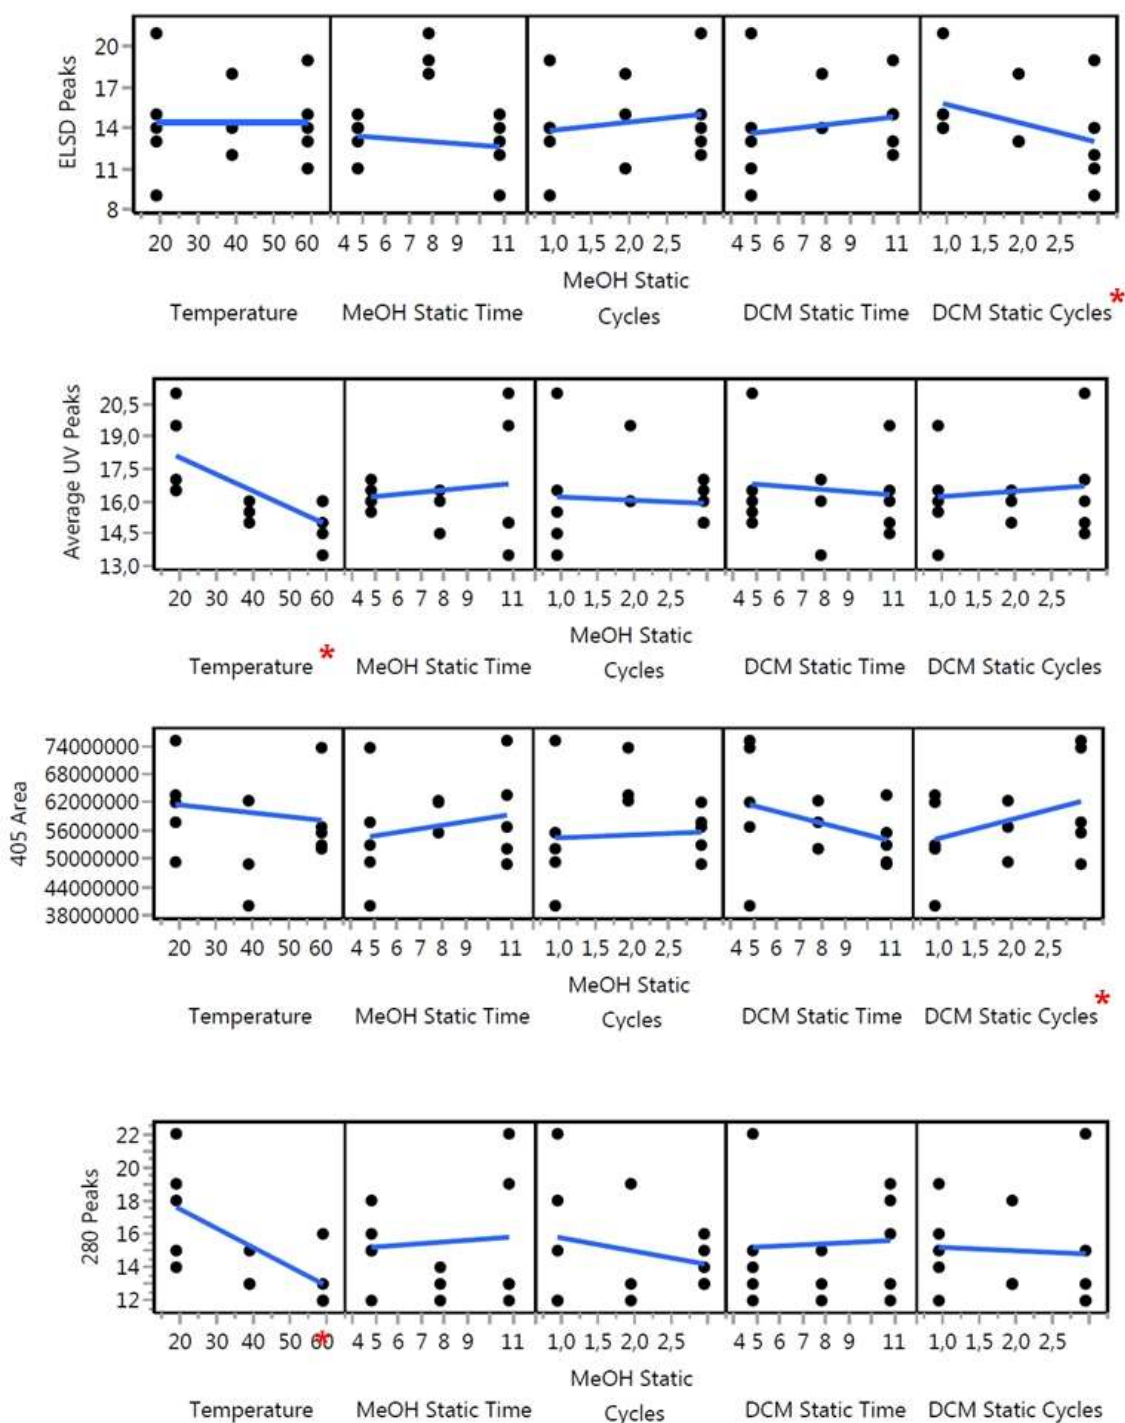

**Figure S1.** Statistical linear regression analyses of the relationships between the five extraction variables and: (A) number of ELSD signal peaks (1<sup>st</sup> repeat); (B) average number of UV peaks (2<sup>nd</sup> repeat); (C) 405 nm UV peak area (2<sup>nd</sup> repeat); (D) number of 280 nm UV peaks (2<sup>nd</sup> repeat).

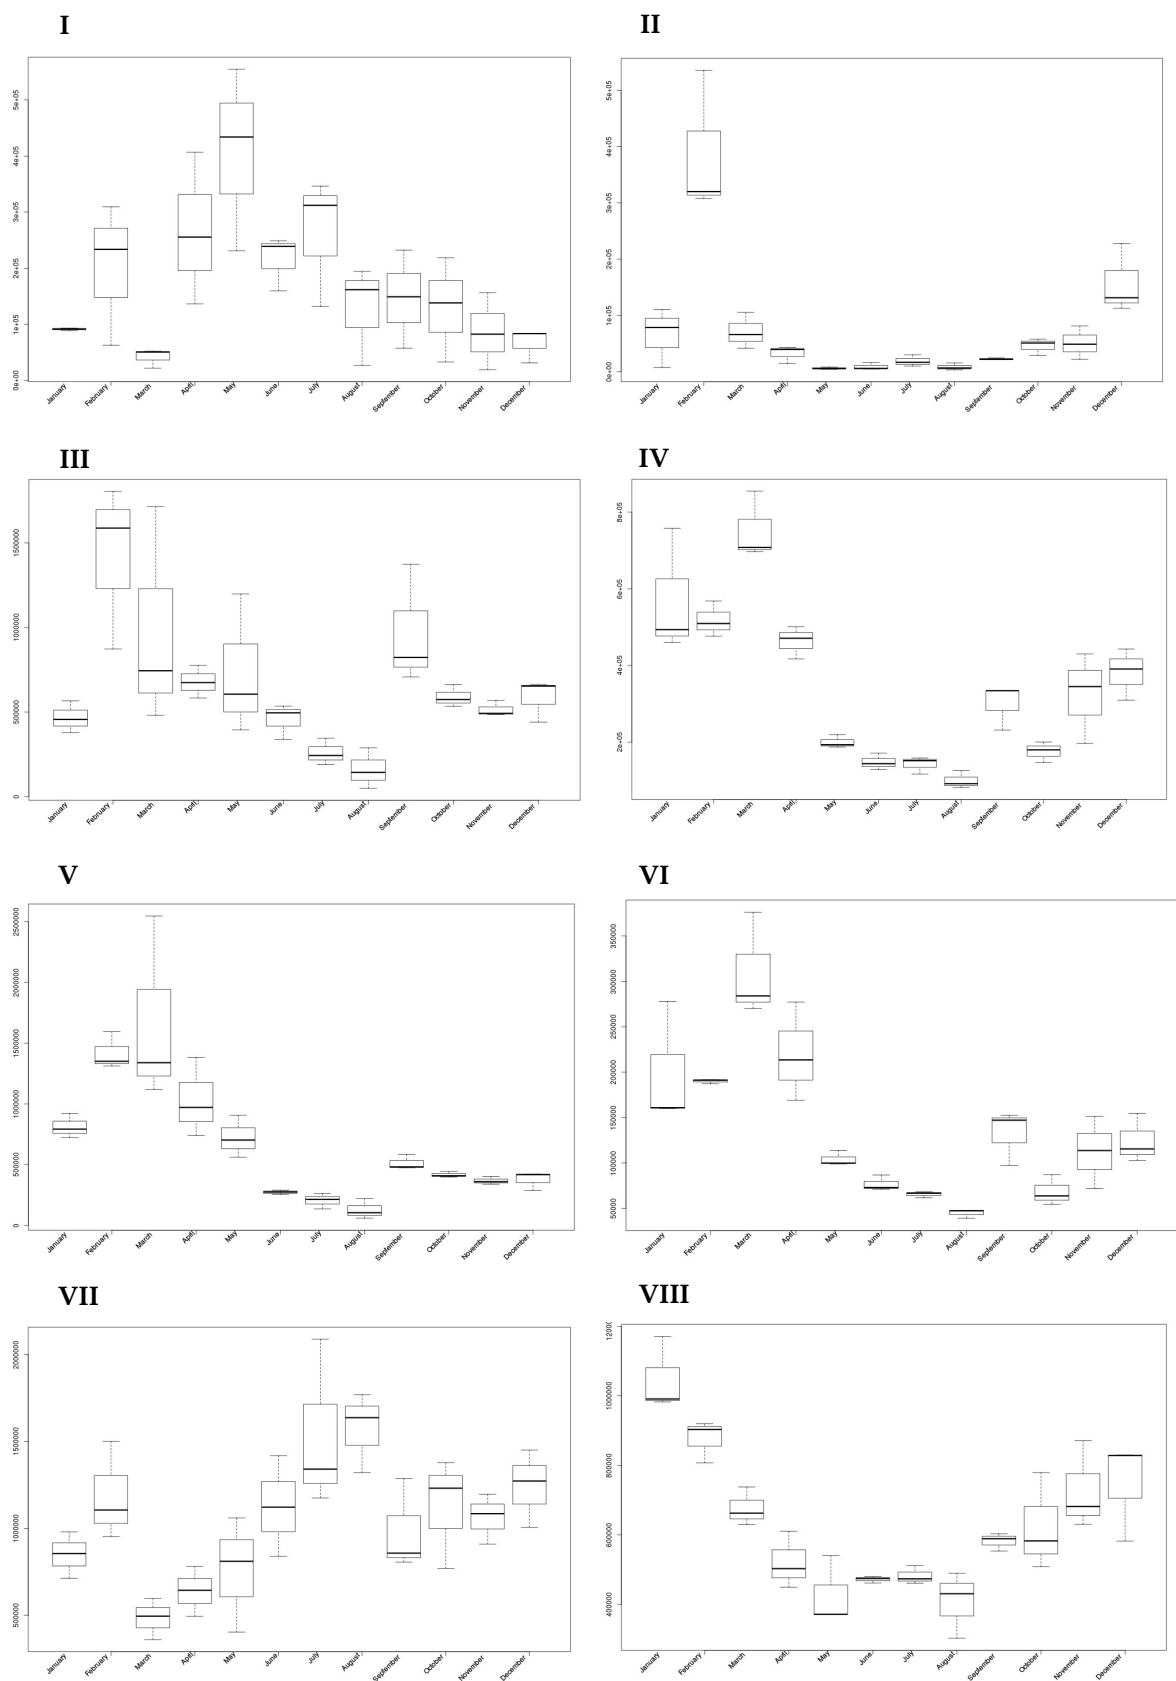

**Figure S2.** Seasonality box plots depicting monthly median (bold), 1<sup>st</sup>-3<sup>rd</sup> quartiles (lower-upper box limits), and minimum and maximum (lower and upper bars) total ion count for compounds I-VIII.

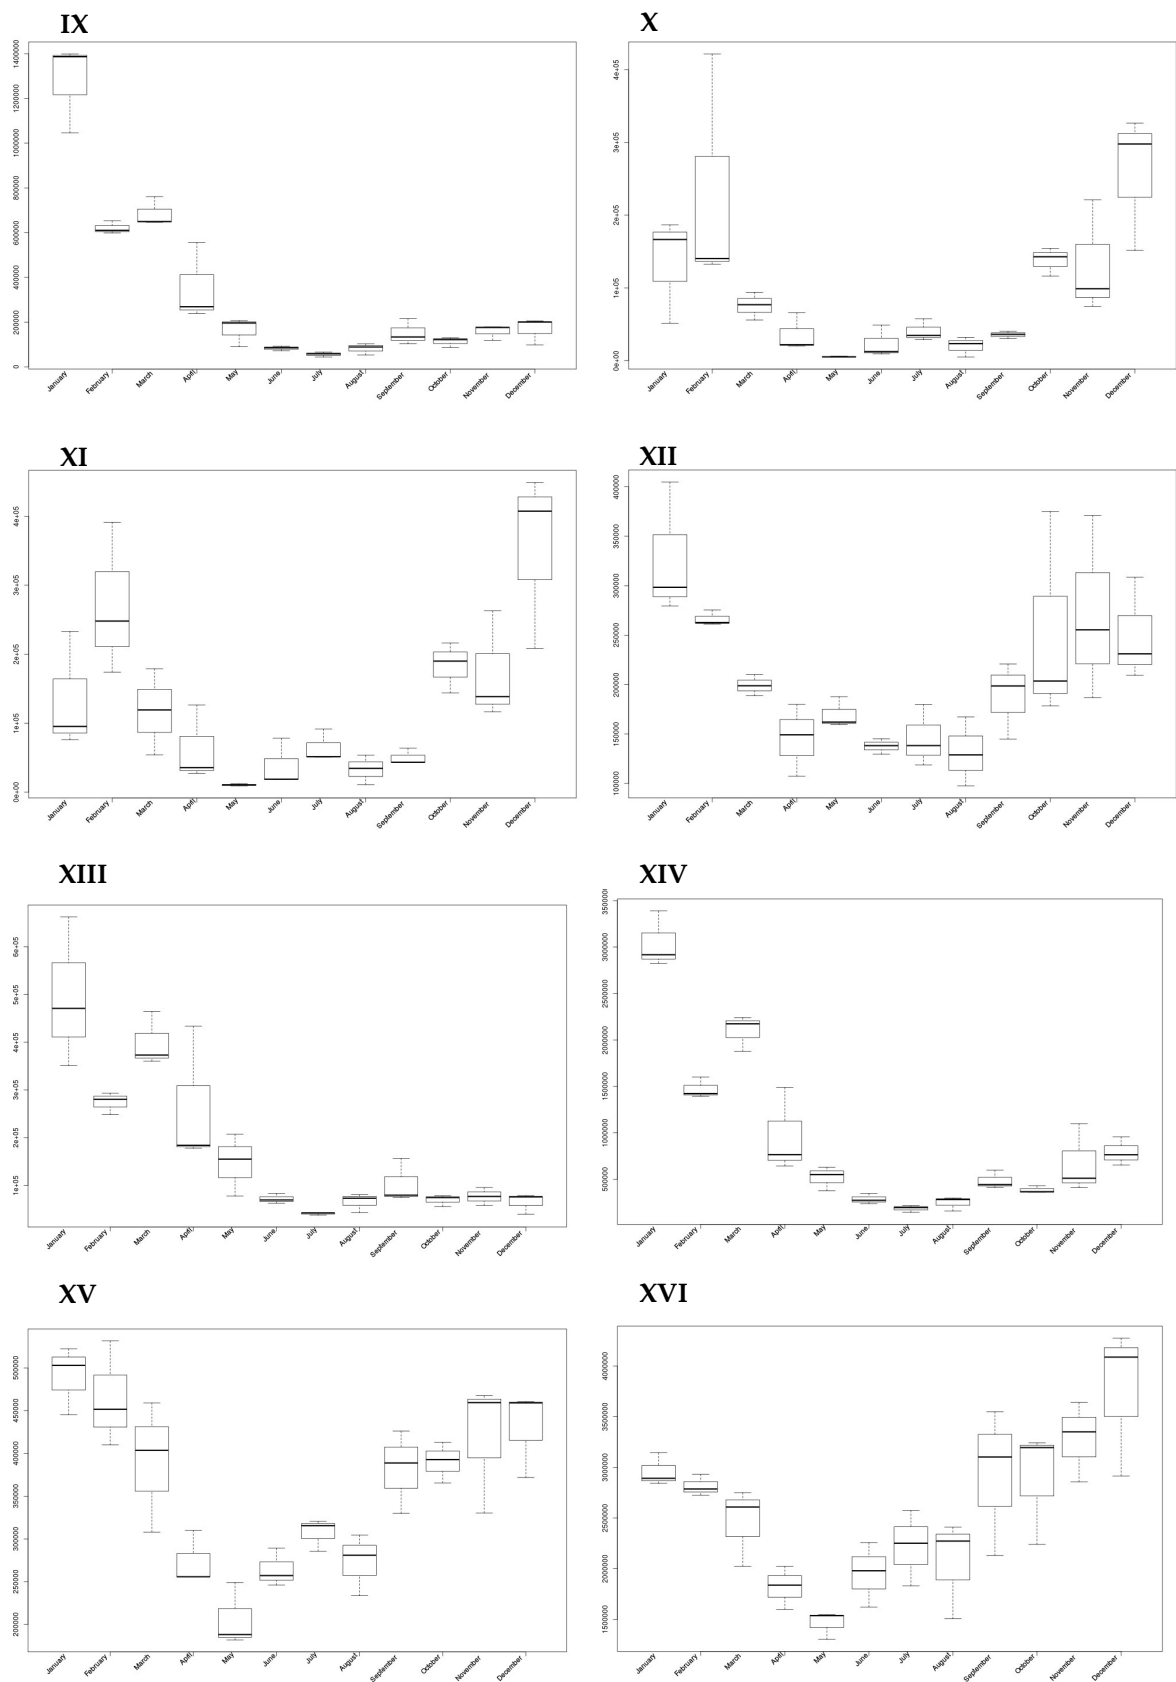

**Figure S3.** Seasonality box plots depicting monthly median (bold), 1<sup>st</sup>-3<sup>rd</sup> quartiles (lower-upper box limits), and minimum and maximum (lower and upper bars) total ion count for compounds IX-XVI.



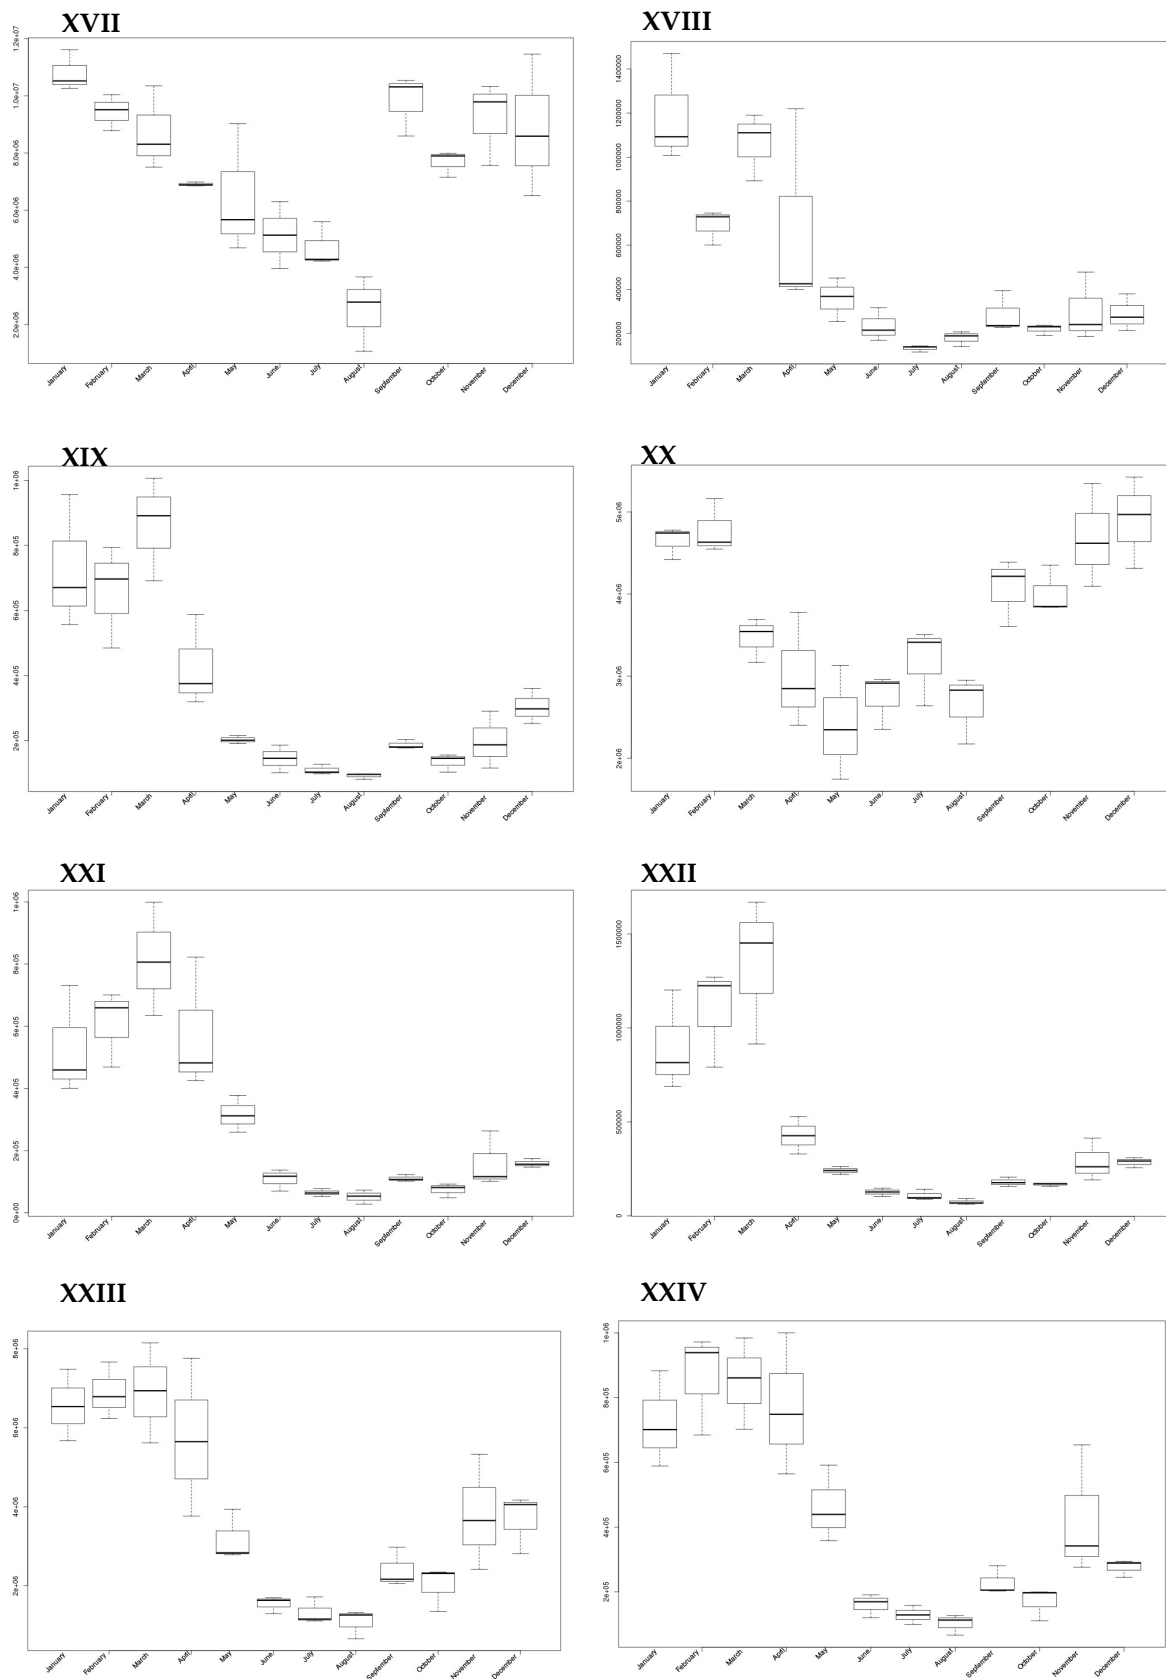

**Figure S4.** Seasonality box plots depicting monthly median (bold), 1<sup>st</sup>-3<sup>rd</sup> quartiles (lower-upper box limits), and minimum and maximum (lower and upper bars) total ion count for compounds XVII-XXIV.

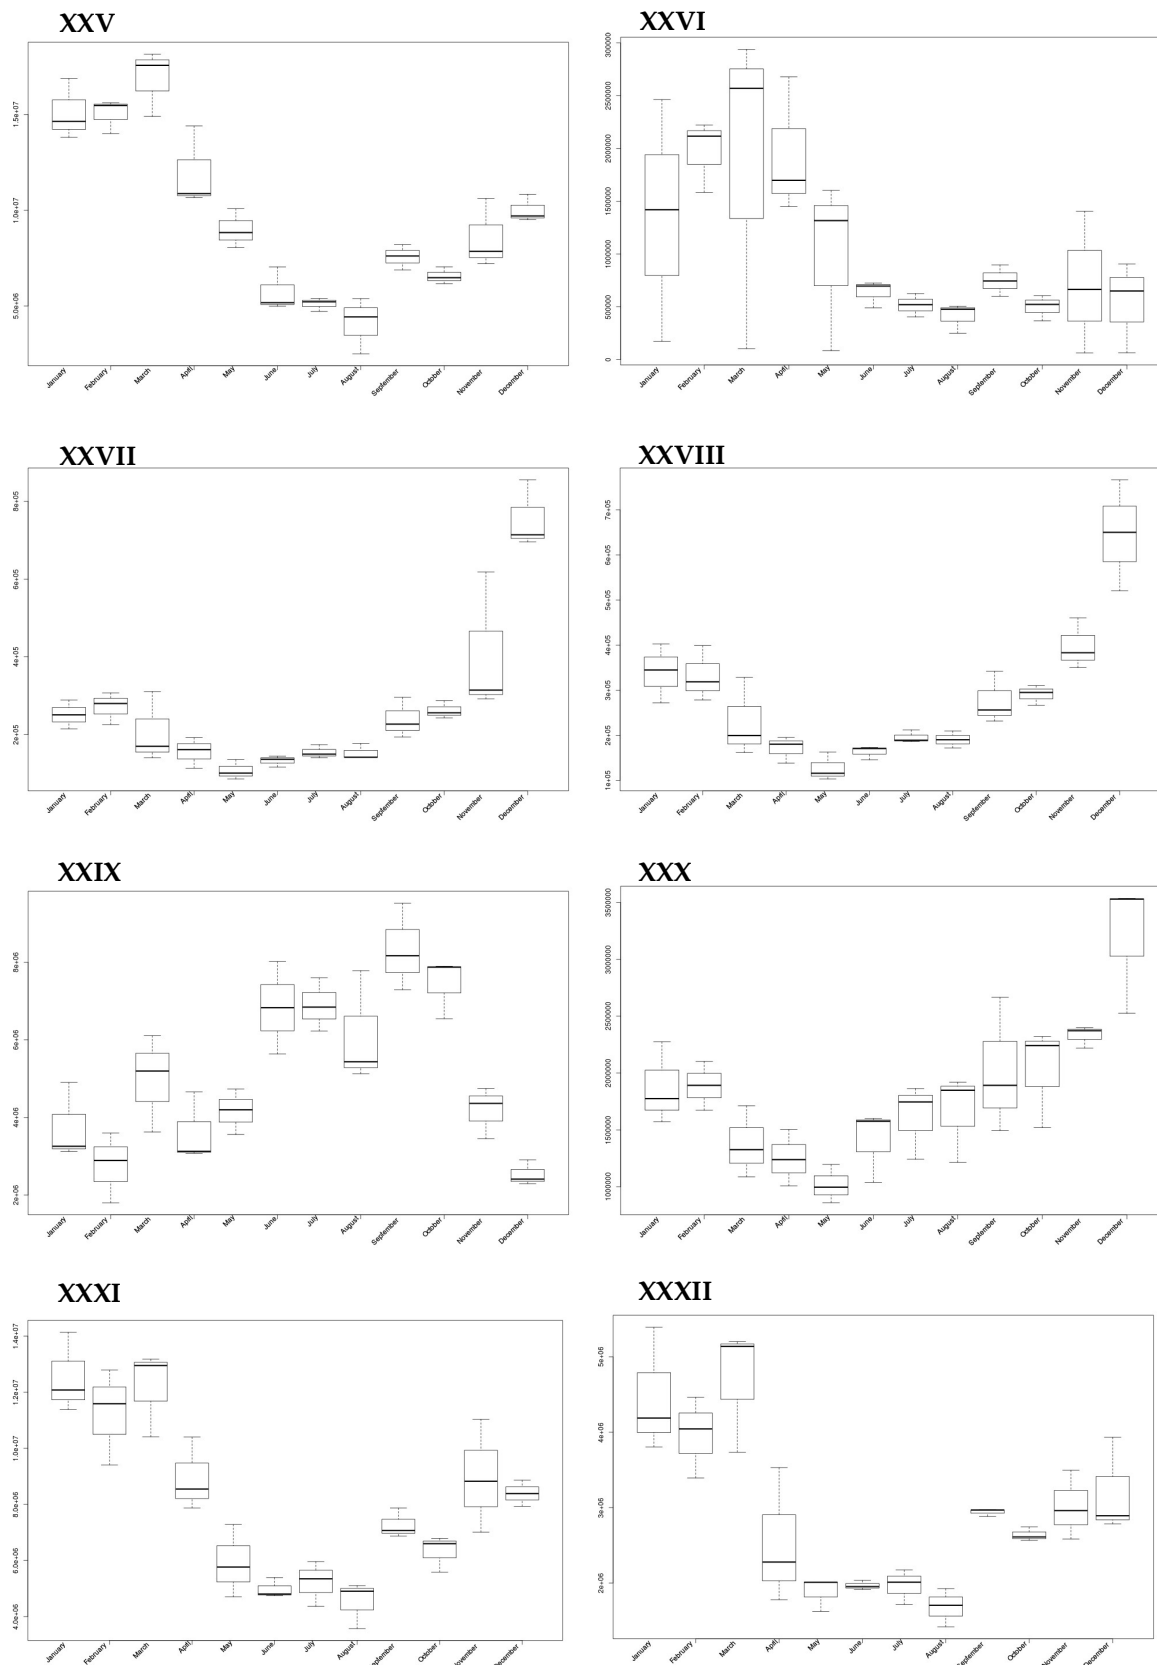

**Figure S5.** Seasonality box plots depicting monthly median (bold), 1<sup>st</sup>-3<sup>rd</sup> quartiles (lower-upper box limits), and minimum and maximum (lower and upper bars) total ion count for compounds XXV-XXXII.

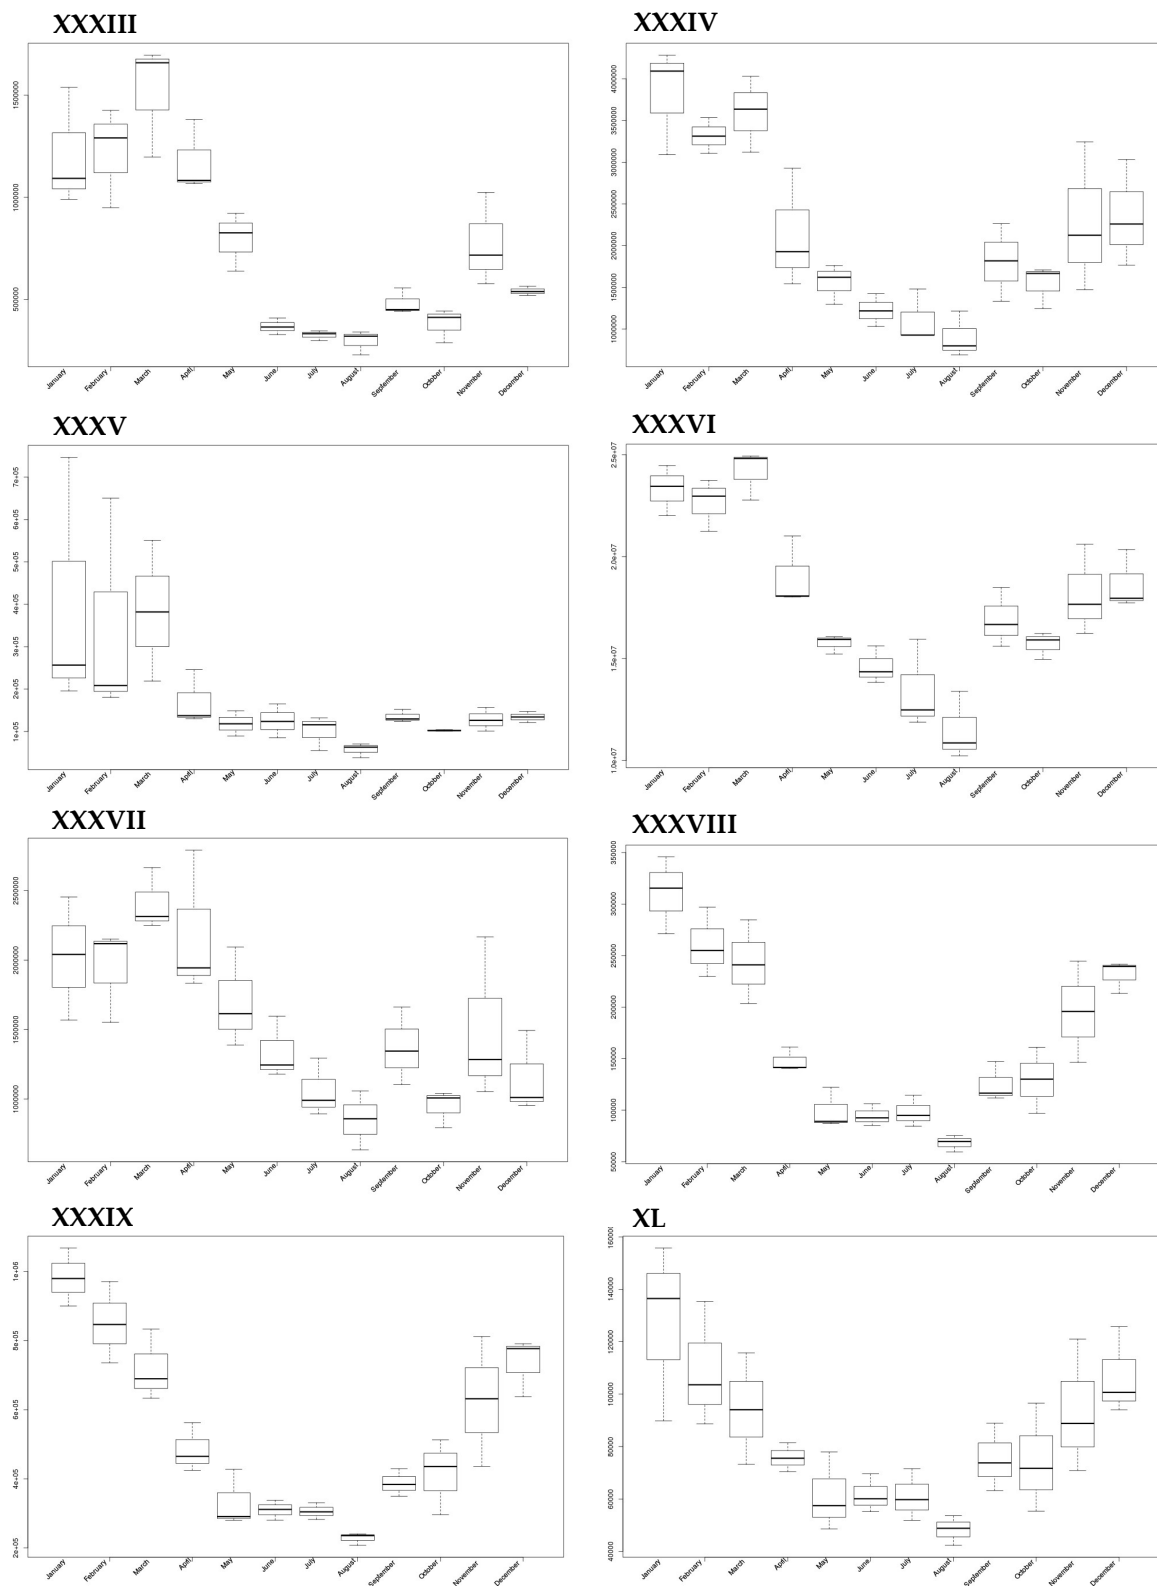

**Figure S6.** Seasonality box plots depicting monthly median (bold), 1<sup>st</sup>-3<sup>rd</sup> quartiles (lower-upper box limits), and minimum and maximum (lower and upper bars) total ion count for compounds XXXIII-XL.

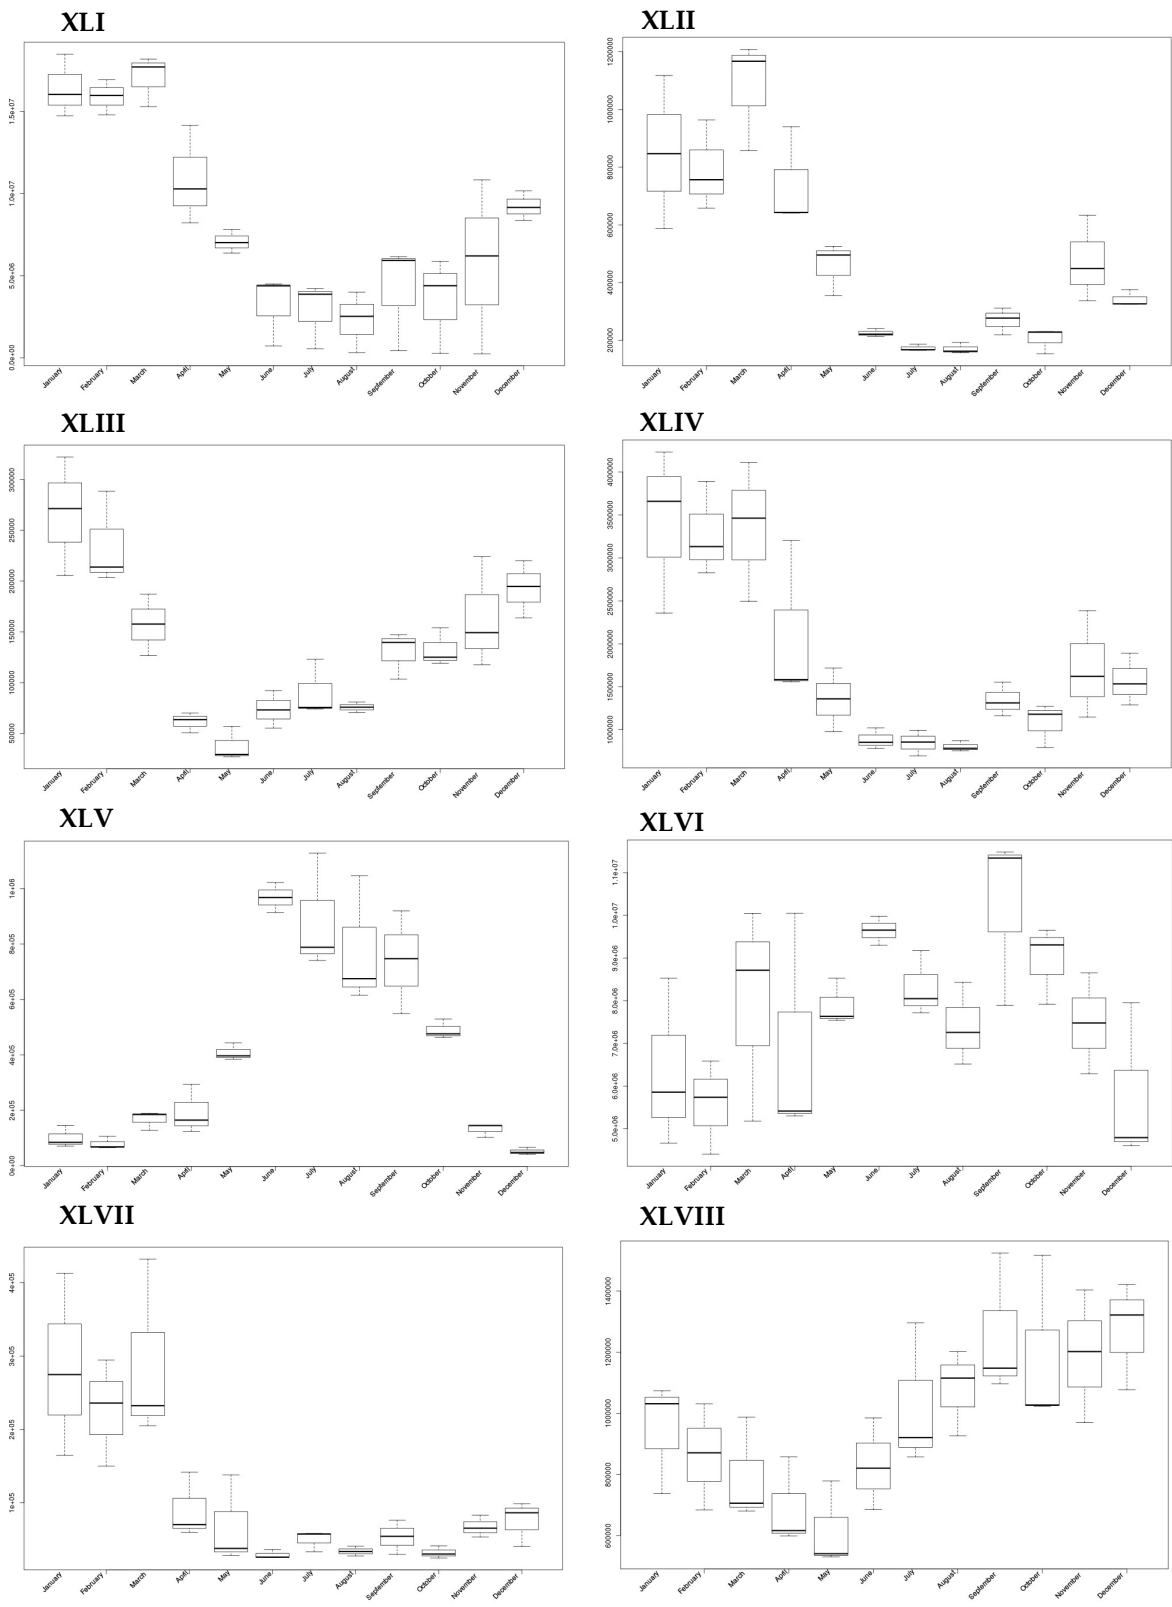

**Figure S7.** Seasonality box plots depicting monthly median (bold), 1<sup>st</sup>-3<sup>rd</sup> quartiles (lower-upper box limits), and minimum and maximum (lower and upper bars) total ion count for compounds XLI-XLVIII.

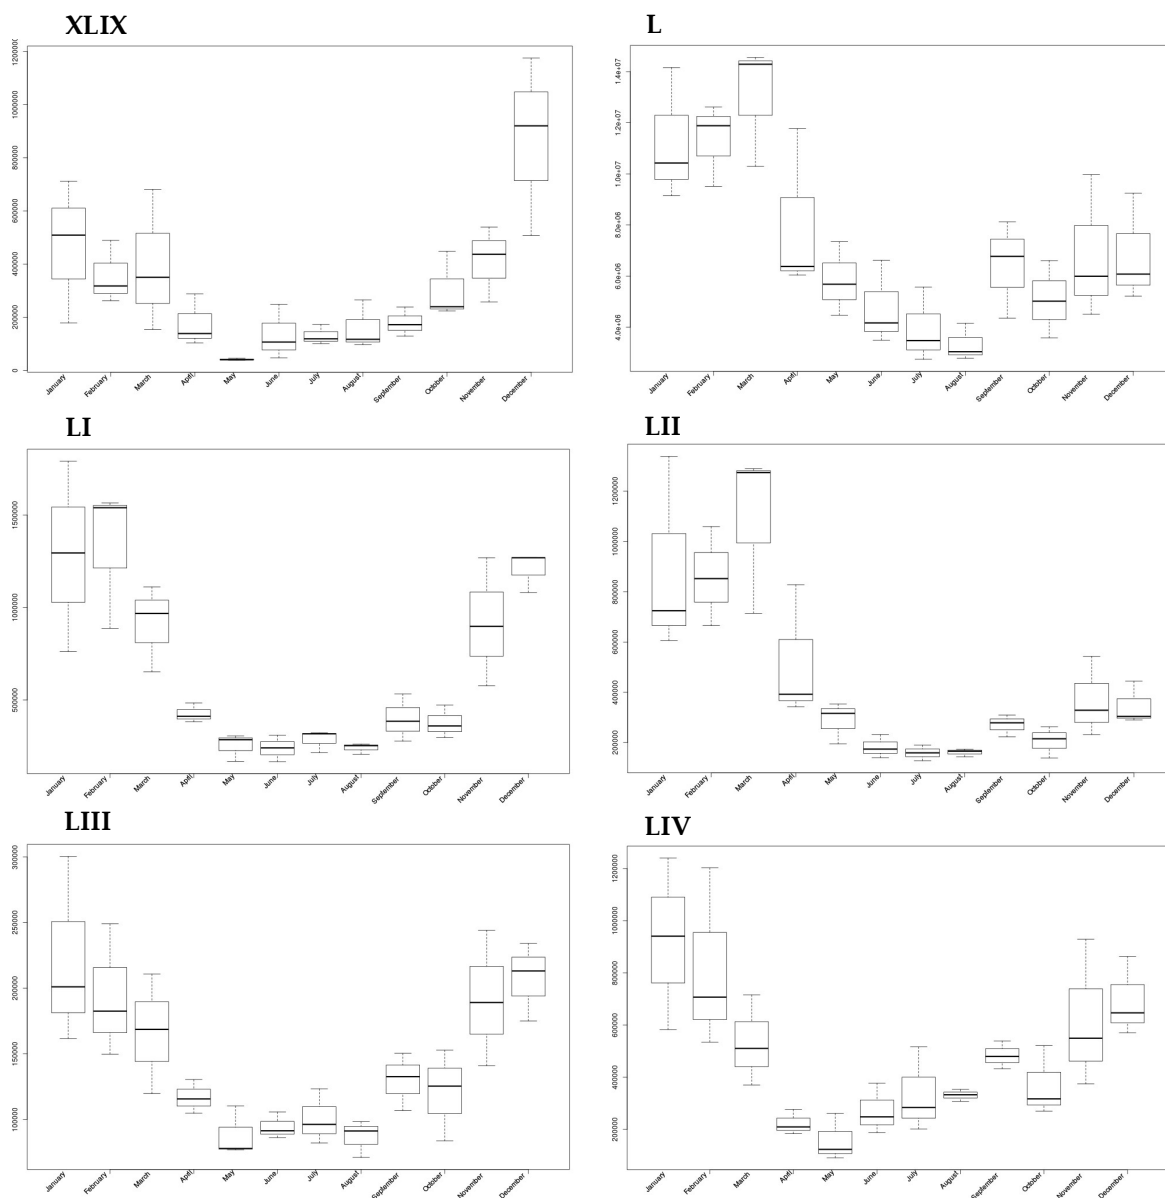

**Figure S8.** Seasonality box plots depicting monthly median (bold), 1<sup>st</sup>-3<sup>rd</sup> quartiles (lower-upper box limits), and minimum and maximum (lower and upper bars) total ion count for compounds XLIX-LIV.
